# Supplementary material for: Rose Virome Analysis and Identification of A Novel Ilarvirus In Taiwan
Source: Preprints.org preprint supplement (doi:10.20944/preprints202210.0401.v1), 2022-10-26
Supplement: Supplementary file 1 [file Table S1_Primers for virus detection-1.docx]

**Table S1.** Primers designed for virus detection.

| **Virus** | **Primer name** | **Primer sequence (5' ¦ 3')** | **Product size (bp)** | **Target gene** |
| --- | --- | --- | --- | --- |
| Apple mosaic virus (ApMV) | AMV-R3-137-F | TGTTAACCTCTTACGATTTCGAG | 1025 | Full-length MP |
| AMV-R3-1161-R | CTCCAGGGTGAGTGTGACCAC |
| AMV-R3-940-F | CGAAGATGTCTCCGATGGAAAGC | 872 | Full-length CP |
| AMV-R3-1811-R | CACGATATTCGATCCCTGACCT |
| Prunus necrotic ringspot virus (PNRSV) | PNRSV-MPF1a | GTTGGTTGAATAGTGTTTCAGTATGGCC | 983 | Full-length MP |
| PNRSV-MPR1a | AGCGTGGGTATGATTGCAAATTCGG |
| PNRSV-CPF1b | atggtttgccgaatttgcaatcat | 699 | Full-length CP |
| PNRSV-CPR1b | gagtgtgcttatctcactctag |
| Rose ilarvirus 2 (RIV-2) | RoseX-R3-1F | CGCTGAAGCTGTTATCCTACCTGA | 1080 | Full-length MP |
| RoseX-R3-1R | TGGAGAAAGGGACGCAAGATAGAG |
| RoseX-R3-2F | GGAACTGTCAACCGCTTCGAGGA | 871 | Full-length CP |
| RoseX-R3-2R | AGCGCAAAAGCAATGACAGTACGG |
| Apple stem grooving virus (ASGV) | ASGV140-F | GTGACTAACCGCTTCTTCTCTT | 695 | ORF1 |
| ASGV834-R | TGTAGCTTGGTCACCCTAATCTT |
| Rose spring dwarf-associated virus (RSDaV) | RSDaV-F | CAGGCTCGCAACAACTCTAAACG | 439 | CP |
| RSDaV-R | GGACTGTCTGGAGGTAGCTCTTA |
| Rose cryptic virus 1 (RoCV-1) | RoCV1-R1-252-F | GCGAGGAGTGCGTAATACATATAG | 557 | dsRNA1:RdRp |
| RoCV1-R1-808-R | GCGCATGAATTGCTGGATAAG |
| RoCV1-R3-F | CGACTCCAATGCTAACGGATGA | 762 | dsRNA3:CP |
| RoCV1-R3-R | CAGCAGCAGTAGCCAGAAATAG |
| Rose partitivirus (RoPV) | RoParti-R1-956-F | GACTGGAGCAGATTCGATAAGG | 614 | dsRNA1: RdRp |
| RoParti-R1-1569-R | CGAGCCATAAGTGATGGTAGAG |
| Rose virus B (RVB) | RVB-F | GGTGTGCCTGAGAAGTCTATTG | 361 | CP |
| RVB-R | GCTCTTCCTTTGTGGGTGATCTG |
| Rose leaf rosette-associated virus (RLRaV) | RLRaV-F1 | GCTGAGGGAAGCGTTGTTCCT | 444 | p58 |
| RLRaV-R1 | CGTCTACCCTTCTTACCAACTC |
| RLRaV-F2 | GCTTTACAGGATGGCTCTACTC | 746 | CP-p19 |
| RLRaV-R2 | CAGCGTTACTCCACTCCATAAGC |
| RLRaV-F3 | GTGGTGGATAACGACACTACTC | 678 | p58 |
| RLRaV-R3 | GCTCTCACACGCATCTCACTATC |
| RLRaV-F4 | TTTCCACATTGTAGGCTGTACTCC | 300 | ORF1a |
| RLRaV-R4 | CAACTCCCTAACCGCCTTATCT |
| Plasmopara viticola lesion associated ourmia-like virus 33 (PvLaOV-33) | Ourmia-F | CTGCAGTAAGTGGGTCAATCTC | 495 | RdRp |
| Ourmia-R | GATGCCCGTACGAAGGTAAGCA |

a Scott *et al*., 1998.

b Malinowski and Komorowska, 1998.
