# Supplementary material for: Rose Virome Analysis and Identification of A Novel Ilarvirus In Taiwan
Source: Preprints.org preprint supplement (doi:10.20944/preprints202210.0401.v1), 2022-10-26
Supplement: Supplementary file 2 [file Table S2_Primers for RIV-2 genome sequencing.docx]

**Table S2.** Primers used for genome sequencing of rose ilarvirus 2.

| **Primer name** | **Sequence (5' ¦ 3')** |
| --- | --- |
| RNA1 | |
| RoseX-R1-27F | CGACCCGGATTAATCAGTTTTCT |
| RoseX-R1-3255R | ACATCCCAGAGGACCCCTTACT |
| RoseX-R1-2688F | CACATTGAAACACCCCTCTATCA |
| RoseX-R1-3052F | GCGGGATCTTCACACAACTTAG |
| RoseX-R1-577R | AACGCAACTCTCTCTCTGGTTGT |
| RoseX-R1-343R | CGTGTGAAGAAGTAGCTGAGTTG |
| RNA2 | |
| RoseX-R2-234F | CGTTAGTGGAGAAGCTATCATGTG |
| RoseX-R2-2911R | CAAAGGTGGGCATATGGACTTAG |
| RoseX-R2-2412F | CGTTTCATGGACGTCACCTAGTA |
| RoseX-R2-2626F | GTCGTGGAGTATTTCCTCCTATGG |
| RoseX-R2-616R | CAAAACGGCTAGACCAGACAGC |
| RoseX-R2-393R | GTATGCCTCTTCAGGCACATCTC |
| RNA3 | |
| RoseX-R3-1F | CGCTGAAGCTGTTATCCTACCTGA |
| RoseX-R3-1R | TGGAGAAAGGGACGCAAGATAGAG |
| RoseX-R3-2F | GGAACTGTCAACCGCTTCGAGGA |
| RoseX-R3-2R | AGCGCAAAAGCAATGACAGTACGG |
| RoseX-R3-1837F | GCTCCTAATAGAGTCCGTGTGAAG |
| RoseX-R3-2036F | CTCCTCCAGACTTTCTTGTCTGTG |
| RoseX-R3-590R | GAGCGGGTATTTTCATCACACA |
| RoseX-R3-441R | GGTCAAGACGACAGGCTTAGTT |
