# Supplementary material for: Rose Virome Analysis and Identification of A Novel Ilarvirus In Taiwan
Source: Preprints.org preprint supplement (doi:10.20944/preprints202210.0401.v1), 2022-10-26
Supplement: Supplementary file 3 [file Table S3_Acc no_Ilarvirus.docx]

**Table S3.** GenBank accession codes for genome sequences of *Ilarvirus* species analyzed in this study.

| **Virus name** | **Abbrev.** | **RNA1** | **RNA2** | **RNA3** |
| --- | --- | --- | --- | --- |
| Ageratum latent virus | AgLV | JX463340 | JX463341 | JX463342 |
| American plum line pattern virus | APLPV | AF235033 | AF235165 | AF235166 |
| Apple mosaic virus | ApMV | AF174584 | AF174585 | U15608 |
| Asparagus virus 2 | AV-2 | EU919666 | EU919667 | X86352 |
| Blackberry chlorotic ringspot virus | BCRV | DQ091193 | DQ091194 | DQ091195 |
| Blueberry shock virus | BlShV | KF031037 | KF031038 | KF031039 |
| Citrus leaf rugose virus | CLRV | U23715 | U17726 | U17390 |
| Citrus variegation virus | CVV | EF584664 | EF584665 | U17389 |
| Elm mottle virus | EMoV | U57047 | U34050 | U85399 |
| Fragaria chiloensis latent virus | FCILV | AY682102 | AY707771 | AY707772 |
| Humulus japonicus latent virus | HJLV | AY500236 | AY500237 | AY500238 |
| Lilac ring mottle virus | LiRMoV | -a | EU919669 | U17391 |
| Lilac leaf chlorosis virus | LLCV | HE572565 | FN669168 | FN669169 |
| Prune dwarf virus | PDV | U57648 | AF277662 | L28145 |
| Parietaria mottle virus | PMoV | AY496068 | AY496069 | U35145 |
| Prunus necrotic ringspot virus | PNRSV | AF278534 | AF278535 | U57046 |
| Privet ringspot virus | PrRSV | KT290039 | KT290040 | KT290041 |
| Prunus virus I | PrVI | MW579753 | MW579754 | MW579755 |
| Rosa ilarvirus-1 | RIV-1 | MT017861 | MT017862 | MT017863 |
| Rose Taiwan ilarvirus | RTWIV | ON843765 | ON843766 | ON843767 |
| Strawberry necrotic shock virus | SNSV | DQ318818 | AY743591 | AY363228 |
| Spinach latent virus | SpLV | U93192 | U93193 | U93194 |
| Tulare apple mosaic virus | TAMV | AF226160 | AF226161 | AF226162 |
| Tomato necrotic streak virus | TomNSV | KT779204 | KT779205 | KT779206 |
| Tobacco streak virus | TSV | U80934 | U75538 | X00435 |
| Peanut stunt virusb | PSV | U15728 | U15729 | U15730 |

a The sequence is unavailable in the GenBank database.

b The virus belonging to the genus *Cucumovirus* of the family *Bromoviridae* was used as an out group.
