# Supplementary material for: Rose Virome Analysis and Identification of A Novel Ilarvirus In Taiwan
Source: Preprints.org preprint supplement (doi:10.20944/preprints202210.0401.v1), 2022-10-26
Supplement: Supplementary file 4 [file Table S4_Virus infection.docx]

**Table S4.** Viruses were detected in the rose samples shown in Fig. 1.

| Sample | ApMV | PNRSV | RTWIV | RoPV | ASGV | RSDaV |
| --- | --- | --- | --- | --- | --- | --- |
| A | P |  | P |  | P |  |
| B | P | P | P | P |  |  |
| C | P | P | P | P |  |  |
| D | P | P | P |  | P | P |
| E |  | P |  |  |  |  |
| F |  |  | P |  |  | P |
| G |  |  | P |  |  |  |
| H |  |  | P |  |  |  |
