# Supplementary material for: Rose Virome Analysis and Identification of A Novel Ilarvirus In Taiwan
Source: Preprints.org preprint supplement (doi:10.20944/preprints202210.0401.v1), 2022-10-26
Supplement: Supplementary file 5 [file Table S5_Annotation result details.xlsx]

## Sheet: Sheet1
Name	Consensus length	Total read count	Single reads	Reads in pairs	Average coverage	subject id	% identity	alignment length	mismatches	gap opens	q.start	q.end	s.start	s.end	evalue score	bit score	subject tax ids	subject title	Taxonomy	Contig sequence
contig_15	2730	311178	61654	249524	15795.3	gi|1464311257|ref|NC_039075.1|	83.391	1445	219	17	1297	2730	1308	2742	0	1319	1637492	Tomato necrotic streak virus isolate 13-382 segment RNA1, complete sequence	Martellivirales; Bromoviridae; Ilarvirus	CGTGTGAAAATTTATTTTACTCACGACCCGGATTAATCAGTTTTCTGAGTATATACCCGTTAGCACTCAATGGATACTATCGTTCAACAATCTAGTAATGTCTTGCGTTTGGATGACTTACTTAACGATGTTGTTCGACGTAATGCTGCTAATGCGTCTACCGATGTTGGTAGATTAATTAGTGATGCCGCTGTGAATGTGGTTAAACGTCAAGTTGACCTAAATCCAGCGAAGCCCCTGAATGTCTCATTCGCTCTGACCCCTGAGGATCAGAATGCATTGAGACGTGATTTTCCAGGGAGGGAGTTGCAATTTCGCAACTCAGCTACTTCTTCACACGCGTTCGCCGCGGCGCACCGTGTATGCGAGACTGATTATATTTATTCAAGATTTCAGACC…
contig_31	666	36412	7116	29296	7670.37	gi|1464311257|ref|NC_039075.1|	87.988	666	74	6	5	666	2678	3341	0	782	1637492	Tomato necrotic streak virus isolate 13-382 segment RNA1, complete sequence	Martellivirales; Bromoviridae; Ilarvirus	GAACGTTGAAGCCCAAATTGATAACATACCGATGTCCAAGGGATGCTACTGCCATTCTGAGTGAGAAGTTTTATAAAAAAAAAATAAAAACCTTTAATCCAATTGCCTCCTCAGTTTCGTTGGTGAATATTAATTCCGGTATGGAAATTCCAGCTGAAAAGGATACGCTGTACATAACGCACACTCAAGCAGATAAATGTGCTATGTTGCGTCATCCTGGTATCAATGTAGACAATGTCATGACGACCCATGAAGCTCAAGGTAAAACTTTTGACAATGTCATTCTGGTACGTTTGAGTAAGACCACGAATTTGTTGTATTCCGGGAAAATGCCCGATGCGGGATCTTCACACAACTTAGTGGCTCTTTCTCGTCATAAGAAAACACTACGATATTACA…
contig_8	2810	223741	43323	180418	11145.2	gi|1464311254|ref|NC_039074.1|	80.698	2663	464	44	178	2810	355	2997	0	2025	1637492	Tomato necrotic streak virus isolate 13-382 segment RNA2, complete sequence	Martellivirales; Bromoviridae; Ilarvirus	TTCAGACTTTGGTTATTGCGTGAGGTGATGATTCCGACCATGAGGTTTTTCGTTAGTGGAGAAGCTATCATGTGTCGATTGACGAATGTTTTGTGTCCTGTGGACACGAACATTTCGTATTCCACACCAGTGCGTGATGAATGTATTTTACCTCCTTACATTCCCTCAGATTTTGAGGATGAGTTTGGAGATGTGCCTGAAGAGGCATACCTTTCACCAGTCGAACGAGAAGAAATTCATAAGGCTAGGTTTTTAAAATGCGAACATTGGGGAAGTGAATCTTCCGGTTCCAGTTTTTACGACGAAATCGAGTCTTATATCGATGAAACAGTGAAGGATGACGTCATTCAAGACGTGCATACCGAAATGCCCAAAGATTATGAAATTATGTGGAATGAT…
contig_16	2414	229505	37613	191892	13430.7	gi|1464311259|ref|NC_039076.1|	79.682	1068	187	22	1230	2282	1042	2094	0	743	1637492	Tomato necrotic streak virus isolate 13-382 segment RNA3, complete sequence	Martellivirales; Bromoviridae; Ilarvirus	TCTGAGCATAAATACCCTTTGTGAACAAACGTATTCATCTGAGCATAAATACCCTTTGCGAACAAACGTAAATTGTCAACCAAGCAAGTTGTCCTATACCGAAATTTCTAATAGGCGTCAGAATTTCGATTCCCACTACCTACTTAACTGTGGATTCAGTGGAAGTTTCGCTTGTGGACAACTTCTGAGAACAACTAATCGGTGGAGTCCGATACGTTTGTGATCAAAGAAAGAGCGTCGAGAGTGTTTATCCTCTCCGCTACCAACGGAATACCCCTCGTCTTGTGCGGGATAGGCTCGCTTTCGGTGTTTCCTCTGCACCAGAGCTTCTGTTGAGGAGTACTTGTTCGAGAAGAGCTTCTAAAATCGCTGAAGCTGTTATCCTACCTGATACGTTCG…
contig_7	1327	55309	15739	39570	5461.62	gi|1370450692|gb|KY965061.1|	93.136	641	44	0	350	990	1556	2196	0	941	12319	Apple mosaic virus isolate 13TF160 segment RNA1, complete sequence	Martellivirales; Bromoviridae; Ilarvirus	AAACCAACAGTTGAACCTGCAAGTGCAATTCAGACGATGGCGACAATGCTATCTTCATCTACGAACTACACCGTCATTAACGGTGTTACTCTTCAAGCAGGTGAGAGTCTTCCGTTTTCGGATTACGTCTCAGTAGCTACCACAATATATGTCCGGACGAAAAAGATGTATGAGGCGATTGAGGGTAATATCAAGAAATTGATAGAACCTCAATTGACGAATATATACGATGTGTTACCAGCCCAACCAAACAGTGGGTTCATAGCCCACGAAGGTTTGACGGGTTTTCTTGGTGACATATTCATGCCTTTACCGAAGAAGGTGCAGGTAGATGGTCTTAAGTCTCGGATACCTGTTTCTCGGTAGGTGTAAAGTCGAGCAAGACTTGATCTCGGACCC…
contig_12	812	19082	4302	14780	3240.07	gi|1907654502|gb|MN822137.1|	96.182	812	28	2	1	812	11	819	0	1325	12319	Apple mosaic virus isolate CITH GD segment RNA1, complete sequence	Martellivirales; Bromoviridae; Ilarvirus	CGTGGTTGTGAAATTAATTAATCTTTCTATCGTGTTTCACACATTAACGAATAGTTTGTGTGATGTGAGATGGATCCCACTGCACTCTCCAATCTGTTAGTCGCGACGATACAGAAACAATGTCTGGATGAGAATTCAGCAATAGGTAAGGCGTTTTCCGAGAGAGGAATTGACGTACTTGACCGAAATCTCCCGAAAGGGCCTGAGGGAGAAAAATTTAATATCAGTTTCGCTGTTACAGCCGAACAGCAAGCATTGCTAAGGCGTAACTTCCCGGGAAGGGACATAAGATTCACGCAGAGCGATTCGCATAGTCATAATTATGCAGCAGCTCACAGACTGTTGGAAACTGATTTCATCTACGGATGTTTTGGAACAGTCGATGAACCGGTGATAGAT…
contig_14	582	13218	3610	9608	2858.66	gi|1370450694|gb|KY965062.1|	90.601	383	33	1	1	383	566	945	2e-138	505	12319	Apple mosaic virus isolate 13TF157 segment RNA2, complete sequence	Martellivirales; Bromoviridae; Ilarvirus	GCTACCAGATGAGATCGAAGTAACTTCGAATGAGAAGGGTTCTGAGGACGTGACGTCCGAAGGGACTGTTGAGATCGATTTAACAGAACCAGTGGTGAATAGTGATCTGGTAACTATTCGCAGATCGATTGAGATCTGGGCTGATGGATCTGAGTTCGGTGTGGAATTACCTCCGATTCCTCCGAACGAGAAAGTCTATACGAAATGGGGAGACGATAGCTCTAGAGATGAGACTGAGGATTCGTTTGACATTAATGCGCTCGATGATGAGCGTCCTGTTTTAGAGAATCCGGGAAAGATCGTGAAGACACCATTACCTCTTATCCCCGATGTGGGAAGATTCGAGACGAATCAATTGATAATGGTTAAGGAGGTCGTGCCTCNNTAGAAACGATTGGA…
contig_2	2027	136164	21686	114478	9449.88	gi|149845997|emb|AM490197.2|	98.324	2029	32	1	1	2027	7	2035	0	3557	12319	Apple mosaic virus segment RNA3, complete sequence, genomic RNA	Martellivirales; Bromoviridae; Ilarvirus	TTATCATTGCGAATCTGGCGATTCCTTTGTATAAGCCTCCTATTTGGTATCTTGACGTCGTTTTCAAGATTGTCGTGTAAACCTACGGTGTTAACCGAGTGACACAGTCTTGGACGAAAGAGTCTGAAGGTGTTAACCTCTTACGATTTCGAGACCGCTCAGGATGACAACACTGGGAGATAAACCCTCTTCCGACTTTGAAGTTGGGGAGTGTTCTATGGAACAATTCCAACAGGTATCGAATGATCTGCATAAGCTGATGTTATCAGCAGAGATGCGAAATCTACCCACGAAAGGATGTCACGTACTTCAACTTAAGAATATGTCGAAGACGAAATCCTTAAAGCTCGAATCCAAAGAGCAGAGAGGGTTCATCGCGAAGATGGCCGATGGGATTAA…
contig_3	856	8149	1671	6478	1320.73	gi|149845997|emb|AM490197.2|	98.25	857	14	1	1	856	1568	712	0	1498	12319	Apple mosaic virus segment RNA3, complete sequence, genomic RNA	Martellivirales; Bromoviridae; Ilarvirus	TTTCTTGAAACCCTTTCGGTCCATCGGATTCGGACCTTTCGGATTACTTTCATCGTAATCCTCGACTAAACCAATCCATCCATTCGAGGACAGACTGTTCACTCGGATTATGAAGGTGTAAATCTTCAAATCCTTCTCCAAGAGATCGCGGAAGACATCGGCAAAGTCAATATTGACAAACTTGCCTTCAACCGCGGCAGTCACTTCTCGACTGCTCAAAACCCTGTGACCCTTTGGAACCTTCGGTTCCACATTCGGGCCTCTAACCTCCCAAGCCGTCCTCCTCACGGATGGACCTCCCTTTACGAGAGTCTTACCCTTATTCGGGTTCGATTGAGCACGCACAACTGCACGCTTTGGAGGAGTAAGTCGATTCGTTCCATGGCACCACTTGCAACC…
contig_22	570	13316	2704	10612	3303.27	gi|149845997|emb|AM490197.2|	98.361	549	9	0	22	570	5	553	0	965	12319	Apple mosaic virus segment RNA3, complete sequence, genomic RNA	Martellivirales; Bromoviridae; Ilarvirus	TGCGAATCGAACGAACGTTTATATTATCATTGCGAATCGAACGATTCCTTTGTATAAGCCTCCTATTTGGTATCTTGACGTCGCTTTCAAGATTGTCGTGTAAACCTACGGTGTTAACCGAGTGACACAGTCTTGGACGAAAGAGTCTGAAGGTGTTAACCTCTTACGATTTCGAGACCACTCAGGATGACAACACTGGGAGATAAACCCTCTTCCGACTTTGAAGTTGGGGAGTGTTCTATGGAACAGTTCCAACAAGCATCGAATGATCTGCATAAGCTGATGTTATCAGCGGAGATGCGAAATCTACCCACGAAAGGATGTCACGTACTTCAACTTAGGAACATGTCGAAGACGAAATCCTTAAAGCTCGAATCCAAAGAGCAGAGAGGGTTCATC…
contig_18	2310	26331	4915	21416	1567.95	gi|1860495120|gb|MN656192.1|	98.674	1508	20	0	1	1508	942	2449	0	2675	37733	Prunus necrotic ringspot virus isolate YJ4 segment RNA1, complete sequence	Martellivirales; Bromoviridae; Ilarvirus	ACTAGATCTTGCGCGTGGTCTACCCTGATCCGAAATAAAACCGTCGTACATACTGTTGACGGTGAGGATCATTGGTGGTACGATGTCACCCGTAGATCGAAGATCCTTGTGGATACTAAGGTATTGACGAAGGTTTTGGAAGCAAGCTTCCGACAATTTAAACCGAATGTGGAGCCTGAGTCGATGATCCAAAACATCGCGACGATGTTGTCTTCTTCGACGAATTACACAGTGATTAATGGTGTCACGCTCCAAGCTGGTGAGAGTCTACCTTATGGCGATTACGTAGCCATAGCCACCACTATTTATGTAAGGACCAAGAGGATGTATGATTCGATACGAACCAACATCGATAGATTAAACGAAACCCGAATAGTCTCGATAAGAGACGAAACTCAG…
contig_40	967	9852	1688	8164	1404.34	gi|1860495120|gb|MN656192.1|	98.345	967	16	0	1	967	38	1004	0	1698	37733	Prunus necrotic ringspot virus isolate YJ4 segment RNA1, complete sequence	Martellivirales; Bromoviridae; Ilarvirus	AGAATCTTTGTCTCAATTGCTTGTTTCTACTTTGCAGAAACAATGCGCTGACGAAACCTCGACGGTGGGGAAGGTATTCTCCGAGAGAGGTGTAGCTCTAGTCGAGCGATCTATTCCTAAGGCCGAAGGTGAGCGACTTAATATAAGTTTTGCTTTGAGTGCCGAGCAGAAGTCCTTGTTGTCTCGAAATTTTCCCGGTAGAGACATTCATTTCGCACAACGAGACTCTTCGAGTCATAGTTTTGCGGCAGCCCATAGGTTGTTAGAAACCGATTACATTTATAAGTGCTTCGGTACGACTGAAGAACCGGTGATCGATCTTGGGGGAAATTTCGTTTCTCACATAAAGCAAAAGAGGTATAACGTACACAGCTGTTGCCCACTTTTGGACGATCGCGA…
contig_87	586	1228	258	970	291.932	gi|1860495127|gb|MN656195.1|	99.317	586	4	0	1	586	419	1004	0	1061	37733	Prunus necrotic ringspot virus isolate YJ5 segment RNA1, complete sequence	Martellivirales; Bromoviridae; Ilarvirus	ACTTTTGGACGATCGCGATGGTGCCAGATTTACCGAACGTTTGATCTCATTGAAGACCTACTTGCGAACGCACAAGGAGGAAAGACATGAGGCAGACTATTGCGAATGCCGCTTCGAGGAGTGCCCGAGAAGGGCCGATTATGTGATGGCTGTGCACGCTGTTAGTGACTTACCTATCACAGATCTTTGTGCTGCACTGACTAAGAAAGGGACGAAGAAGATGATTCTTTCCATAATGATGGATCCGAATATGTTGTTGAGGGATGTTGGTGAAATCCCGAACTTCAACGTACGTTGGGAGATAGACAGAACCGAAGATATTATAAGGTTCGATTTTATCGATGCTCCGTGTTTGGGCTACCAACATAAGTTTTCTGTACTACAGCAATATCTCACTAC…
contig_36	2578	16982	4370	12612	896.971	gi|1475829506|gb|MH727232.1|	96.045	2579	100	2	1	2578	11	2588	0	4196	37733	Prunus necrotic ringspot virus isolate P.cerasifera1 segment RNA2, complete sequence	Martellivirales; Bromoviridae; Ilarvirus	TCGTGGTTGAGTTACAATGAATCCTTTGAATCAGTTGTTGACACATGGGTGTTCTGCTATTTCCTCTGCTTTGCATAGAGACGTTGCTTACACCCAGTTTTCTGATGAGTGTTTTGAATCTCATTTCACTCAGATTTCCACCGAATACTCTCTTACTGCTTCCGCTAAGAAGTTGTTTGAAGCGTACATGGTGACGATGTTTCTTAAGAAACACATGAGTTACGTATTCGAGGACTTTATAGGATCCGAGATGGGTCCGTATGTCCAGACCAGATGGCGGATCGTTTTTGATCTGGATGAGGTCGAAGAAGAGTACGTTTACAAGCCCGATTTCTATTATTACGATGTTTATGATTATGAAATGGGCGTGGATATACCTGCGTCGATACTGGAGGATAT…
contig_5	1624	69272	13264	56008	5862.65	gi|1860495124|gb|MN656194.1|	98.276	1624	28	0	1	1624	291	1914	0	2844	37733	Prunus necrotic ringspot virus isolate YJ4 segment RNA3, complete sequence	Martellivirales; Bromoviridae; Ilarvirus	TGAAGGCGTTACCAACGAAAGGTTGTCACATCCTGCATTTGGTTAACCTCCCGAAATCCAATATACTGAGATTAGCGAGCAAGGAGCAGAAAGGCTTCCTCTCGCGACAGGCCGATAAAGTAAAGAAGAAAATTTACAGATGTGTAGGCCGAGTATTCCTCGTTTACGTACCGATCATTCAGGCAACGACCTCGGGTTTGATAACCCTTAAGTTGCAAAACTCCGATACAGGAGAGATTTCAGACGTCGTGACAGACGTCGAAGCCAACCGCGCCTTTGTTATTATGGACAGATGGGGAAGATCCCTGGTGGAATCGGCAGATTTAAATCTGTTGTATTCCATTTCATGTCCAGACGTCCGACCTGGAGCCAGAGTGGGAGAGATGATGGTTTTCTGGG…
contig_11	1595	57806	10964	46842	5049.52	gi|1860495124|gb|MN656194.1|	98.621	1595	22	0	1	1595	1914	320	0	2824	37733	Prunus necrotic ringspot virus isolate YJ4 segment RNA3, complete sequence	Martellivirales; Bromoviridae; Ilarvirus	GCATCTGCTAACGCAGGTAAGATTTCCAAGCATGAAAGCCGGGAAGCGACTTTCAGAAATCTATTTCGCAATATCCACTATCGGTGGTGCGAACTTTCCATTCGGAGAAATTCGAGTGTGCTTATCTCACTCTAGATCTCAAGCAGGTCCTCATCGACCAGCAAGACATCAGTCGGAATTTGTACTCGTGGTAAGTCACTTACCACTACGTACAAATCCCTAACCAAGACCTTGGCCCCAGCGGGCACTTCGGTCTTGAATTCGATGACGACACGATGCGTACGCGCAAAAGTGTCGAAATCTAAATCGGAGGGAGGTTCGAACTGCCAACCTCTCGGTTGGTCCTTCAAGAACCCCTTCCTAGACAGGGCATTCGGACCATCAGGTTGATCCACCTTA…
contig_33	1552	7029	1467	5562	622.927	gi|725612204|gb|KM598758.1|	99.936	1552	1	0	1	1552	176	1727	0	2861	492502	Rose cryptic virus 1 segment dsRNA1 RNA-dependent RNA polymerase gene, complete cds	Durnavirales; Partitiviridae; unclassified Partitiviridae	AGAGGTATGGAGCATCGCTTCCGTGGTATTCCTAGAGGTCTCATTGAGCTCGAAGAAATCCCGACGCGACGCTTACGCGAGGAGTGCGTAATACATATAGACGCCTGGAGCTCACAAGCAATAGACGCCATAGTACCGCTCTCACTACGCAACGAACTAGATGGCTGGGCCAGAAGCTACTACACGCTTCAAGCACACGTTGATTCGCTCATGCAATATGATCGACCAAAGTTGCAACCACCCACCAATACCGCGTGGAATATCACCACACAGTATATTCGGACTGAATTTGCTAGGATGAAGAAAGTGACTGCATTGTCTTATCTTCAACTTGACCAAGTTAAATGGGTCAGATCCTCAGCTGCCGGCTACGGTTACACAGGTCGTAAAAGCGACGGT…
contig_70	1494	2402	316	2086	226.598	gi|725612206|gb|KM598759.1|	100	1474	0	0	1	1474	10	1483	0	2723	492502	Rose cryptic virus 1 segment dsRNA2 hypothetical protein gene, complete cds	Durnavirales; Partitiviridae; unclassified Partitiviridae	CCACCGAAAAGGTTCATTATCTCTTTAGTTAGGATTTAACTTCTAAGTTTCACTTCATACTTATAAACTTACTAAGAAGTTGCTATACATCCTACACTAACGAATTCCTGTTTGATTTGTTTCAGTGAGTAACTAAACTCATACATCTTACGACCGTAGCTAACGAGCCTACCCAACACCATGGATAAGGATGCTGCCGCCGCCCAGACTGAGCAATCAAAGATTACGGAGAGCCACGGATCTTCACCTGAGAAGAATGCCGCCGCTCACACTGCTGATCAGAAAGCCGCTGTTGGATCAACCTTTCAGCTGCAATCCCGGAAGCCCACAGAGCCACCCACTGTACCAAGTGCGTTCGCTCAATCTACGGCACTTAATGTGTCTGTGGGTAATGCAGAC…
contig_20	1366	16140	2814	13326	1654.27	gi|725612208|gb|KM598760.1|	99.927	1365	1	0	1	1365	9	1373	0	2516	492502	Rose cryptic virus 1 segment dsRNA3 hypothetical protein gene, complete cds	Durnavirales; Partitiviridae; unclassified Partitiviridae	TCCAGGGAAAGATCATTATTATCTTTAAGTGATTAACTTTCTGTAAAATCTACATTACAGGTAATTATTCACTCCCTACCCTTCCCCGTAGTTCTGTACGAAGCTTAGCGTTTTATAAAATTTTATAAAGCTATCTGCATTTTAACTATCCTAGTTCCGCAGGTATGGCTAGCTCCAAACGAACTCCGCCGCTTGTTGCACAACAACCGAAGAAACGCCGTTTCGAAACGGTCTTCGATCTTGGACCCAGCTTAGGATCTACATCCCTCGCTATGGTACATGTGCCACAACCGACTCCAATGCTAACGGATGAAGCTGAACAAATGGCTGAATTGCTATTTCGCGAACGCTCCCGAATTGAATTGGATATTAATCCTGCTTATGTCAGTGAACTCGAAC…
contig_98	1913	2513	421	2092	184.421	gi|1042761297|gb|KU896858.1|	99.425	1913	11	0	1	1913	10	1922	0	3472	1871267	Rose partitivirus isolate PB segment dsRNA1, complete sequence	Durnavirales; Partitiviridae; unclassified Partitiviridae	CACCAGTCACCGTGACAACTTCACAGACAGGTTTTATAAAAGAAGAAAATTTTCGTCCCAGCAGAATCATTCTACTCACAAACACACCATGCGAAACACTGTTGTAATTGGACATCGTCCAGTTTTAGCCAAGCCTTTATTTGGAAATCCAGATCCTGGATCCAACCCGGCCTACGGCGACACAGTTGATCACGCCCTAAAGCGGCACCTCTCTCCCGAAGAGTTCGACATCGTAGTTCACAAATATAGACGCTCACCTTGGAACGAAGACGCATTAAAAGATGACATTGCTAAATTAGACAGCAACGAACATCCCGTCCTCAAAGATGAACATTACTATCGAGCTATCGAACATGTTAAGAAACTCTTTACACCAGAAGAGAAATTGAGACCTGTACA…
contig_53	1793	2248	356	1892	172.772	gi|1042761299|gb|KU896859.1|	98.606	1793	25	0	1	1793	12	1804	0	3173	1871267	Rose partitivirus isolate PB segment dsRNA2, complete sequence	Durnavirales; Partitiviridae; unclassified Partitiviridae	CCGAAGCTGACATAGTATCTAACTTCGGTCTTATAAAATTAAAGAATTTTAGTCCCAGCAGATAATTTTCTACTTACCCACCCACCCACCCACACGATGTCGCAAAACATTGAAGCCGTCCGCTCATTTCTCCAAAAGGAGAACCTTGAAGAAAGCTTCCTCAAGGCAACTGGCCTATCCTCACTGGATGAATTACATCCAAAGAACTTTTCTGAGTTCAGTTTGCCCAACCCCCCCACTGTCACCCAGCCCGCCGCTCCCTCTGCCCCTATCCCCCACAGGCAGTTACCTAAGAGTGCAGCTGATGCCTCAACTGGCTTTATGCCTAAATCAGCATCTGACATGCTTAAGCCATATGTTGGCTTAAACATCAACTACAAGGCTAAGAAGACCCAGTCT…
contig_44	5482	5461	903	4558	139.551	gi|1249614036|dbj|LC184612.1|	90.644	5483	511	2	1	5482	10	5491	0	7282	28347	Apple stem grooving virus genomic RNA, complete genome, isolate: Nagami	Tymovirales; Betaflexiviridae; Trivirinae; Capillovirus	CAGCGCTTAATTTCCGCGCTTTACGTCAATGGCTTTCACTTACAGAAATCCCCTCGAAATTGCAATCAACAAACTTCCCAGCAAGCAGTCTGATCAACTGCTTTCCTTGACCACCGACGAGATTGAAAAGACCTTAGAAGTGACTAACCGCTTCTTCTCTTTTTCGATCACACCAGAAGATCAAGAACTGTTGACCAAGCATGGTTTAACACTTGCACCCATAGGGTTTAAGTCACATTCCCATCCAATATCCAAAATGATAGAGAATCATCTCTTGTATATATGTATTCCAAGTCTTTTGTCTTCCTTCAAGTCAGTTGCTTTTTTTTCACTTAGGGAGAATAAAGTAAATAGCTTTCTCAAGATGCACTCAGTTTTTTCTCACGGAAAAATTAAATC…
contig_74	5479	2805	475	2330	72.188	gi|1700711618|gb|MK929792.1|	90.594	5475	511	4	1	5473	5473	1	0	7254	28347	Apple stem grooving virus isolate BR-Brae1, complete genome	Tymovirales; Betaflexiviridae; Trivirinae; Capillovirus	CACCTTCCTCCAAAAACAGCGGGGATTTGTGATCCAGGATGGCCATTTTGATTTCTTCATTGAATTTGAGTGCTTCACAGCCGCTGATTGCCTGTGAAGCCCACCCTGAATCACCAGTCTTGGTTTCCAGAAACCTTGCAGAGTTGACGCACCTATATGCAACTCCAATGTCAAGTGCAAACAACTCGGTGTCCTGTTCATATTGCGGACAATTAAAGTCCACACGGAATCTGAACCTTTTTGCCAAATTTGCATCTGTAGTAGATAGGCAGTGCTCTGGCCTGAGACCAAAGTAACAACAGTCAGACTCAAACTTGAAAAGATATGAGCAGATGTGGCCTCTTTCTGGATCCAGGCAGGCTCCATCATATACAATGACTCTCCCTTCCATGCCTCTAA…
contig_78	716	3774	3360	414	218.936	gi|1614056864|dbj|LC475148.1|	93.994	666	38	2	1	665	5816	6480	0	1007	28347	Apple stem grooving virus ASGV_SG genomic RNA, complete genome	Tymovirales; Betaflexiviridae; Trivirinae; Capillovirus	TTTGGTAATATTGCTGTTTTCGGGTCATCTGATAAGACCCAATTCCCCGCTGTTGGATTTGATACACCTCCGGTTCATTATACTCTGACAACGACCCCGAAAGAAGGGGAAACTGAAGAACAAAAGAAGGCCAGAGAGGGTTCGTCTGGCGAAAAAACGAAAATTTGGAGGATCGACTTGTCAAATGTCGTTCCTGAATTGAAAACCTTTGCTGCTACTTCTAGGCATAACTCTTTGAACGAATGTACGTTCAGAAAGCTTTGTGAGCCATTTGCTGATTTGGCTCGAGAATTCTTACATGAGAGGTGGTCAAGGGGACTTGCCACCAATATCTATAAGAAATGGCCCAAAGCTTTCGAAAAAAGTCCATGGGTAGCATTTGACTTTGCTACTGGTCTA…
contig_231	597	46	8	38	10.8392	gi|1916866153|gb|MT473961.1|	95.462	595	27	0	1	595	7851	8445	0	950	2777710	Rose virus B isolate R12, complete genome	Tymovirales; Betaflexiviridae; Quinvirinae; Carlavirus;	TTGCAGATACAAATAAAATTACAGGCCCTTGGTGTGCCTGAGAAGTCTATTGCCACTGTGGCTTGGGATATGGGTATGTACTGCACTGCTAACAGTGCTTCACCGTACATGAACCCGAAAGGCTCAATTGAAGTTGAAGGCAAGGCAATTGCAAGGGACCTCGTTGGTGCTGTGATAAAAGAACACACAACTTTGAGACAGTTCTGCAGGGCTTATGCACCTTGCATCTTCCAACATATGCTGTTGCATGAAACTCCTCCACCGAATTGGCAAGCGAAGAAGTTCCCTGAGGTGGCAAAGTACGCCGCTTTTGACTTCTTTGACTATGTCATGAATCCAGCTTGCATACAGCCTCTTGAGGGTCTGATCAGATCACCCACAAAGGAAGAGCAAATTGCA…
contig_276	831	67	7	60	10.9663	gi|1916866153|gb|MT473961.1|	93.742	831	52	0	1	831	1897	2727	0	1247	2777710	Rose virus B isolate R12, complete genome	Tymovirales; Betaflexiviridae; Quinvirinae; Carlavirus;	GGAAGAATTGCTTAAGGTTGGGAGGAGTCTTCTTTCAATGCATATTGATGATGTCAAAGATTTCTACAAGGTCAAAGCTTGCAGGCATAAAACGATCTTTGCAAAACAAAGTTCGGTGCTTGAAGAATTTGATTACATGGATGAGTCTGCGGATTCTGAGGATTTTGATTATGAATCTTTAACTCCATCCCTTGAAAGAATGTTAGAGAAGAAGGAGCATGACTTTATCCCAAAGATTGATGAGATAGCACCAGAAGAGATTTTCTGCACCTGCGGCATAGCTTTCGCTGAAGGGAGATTCACATCAAGAGAATTAGTACCCATGATCTTCCCTGATCGATTGAAAAACCGTAGTTGTGCCTGGTATTCAGAGCAGGGTCTTGATTACAAATACAATGG…
contig_280	601	66	12	54	14.5691	gi|1916866153|gb|MT473961.1|	92.18	601	47	0	1	601	7319	7919	0	850	2777710	Rose virus B isolate R12, complete genome	Tymovirales; Betaflexiviridae; Quinvirinae; Carlavirus;	TTGGTTTGTGCACTTAGGTTATAATACTTATAATTGAATTGTTAATAGAGTGTTTCGAATTTGTCCAGTAATTCGCTATAAGATGAGTGAAGCCGGGCAAACTGTTAGTGGTGTTGGATCGCTCAGCACTGGATCAAGCCCCGCAAGGGGAACTACTCTGGCGCCACTAAATTCTTCTGTTCCTCTTGATGCTCAAACAACTCAGTTGCAACGGCCACCAACAAGGAATAACAATAGGGTTACTGCACCTCAAAGTGGTTTTGGATTGTCTGATGTTGATGCTGATGTGCTCACTGAGCCTCTTAATGATGTTCTTGAAACTCGTTTCGAGAACCTTAAGCAAGCACTAATCAGGATGCAGAGTCCAAATCAGTATACCAACTTGGGATTGGAGATTGG…
contig_28	929	264	42	222	38.2842	gi|1967568509|gb|MW056181.1|	94.833	929	48	0	1	929	15448	16376	0	1450	1543207	Rose leaf rosette-associated virus isolate VP Rose 126, partial genome	Martellivirales; Closteroviridae; Closterovirus	AATAAGGAACGAGAGATATGGCGATTGGCTCGCGACATGGCTCTGGCACCTAAAGAAAGTAATGATGCCGCTCAGACTATAACTTCGTTGACACAATTGGGTTTAAAAACCCACGGATCATTGTATCGATGAGTCTCCACTCGTTATTGCTGGGTTTAGGGACTCTATTGGTCCTTTGTGTTATAATAACAACTCCCGATGCGTACACGTCGAGAGCGGTTTTGAGTTATCTGCTGTGCAGGTCGGTTCTTTCAGTGCTTTCTTCACTTATTGAGCTGATCTACGACTACGTACTCGATGGATGTGAACTATGCGGAAGGAGAAAGTGAGTCAGCTTATTTTTCCGCTTATGTTGTGAGAGAAGCGAATGTGTATTACGTACACGTTCGATTGAATGAT…
contig_103	519	54	12	42	14.1734	gi|1967568509|gb|MW056181.1|	95.954	519	21	0	1	519	10781	11299	0	843	1543207	Rose leaf rosette-associated virus isolate VP Rose 126, partial genome	Martellivirales; Closteroviridae; Closterovirus	TGTTGGTCAGTTTTCAACTCGAAGGGAGTTAAGAGAGCCTCAACCCGCGCGTGCTCTTAATAGCGCGACTATCTCTGCGGTGGCGTGAAGTACAATGGTTGTGTTTGGTTTGGATTTTGGTACGACTTTTTCAACTCTTGCGTTGGCTACAGAAGTGGAGTACATACTACTGAAGCAATCCGATTCGGCCTACATACCAACAGCTCTCTTTCTACCATCGTCTAACGTAACCGACGCTTATTATGGTTACGACGCTGAGTATGCTAATCGCAGTGGTATGCCCGGGTGGTTCTTCAAGGATCTTAAGAGATGGGTGGGGTGTACTGAGAAATCAATCTCTAAGTACGTCGATAAGTTATCTCCGTCATATTCCGTCAAGACTACTAACCTTGGAAATAG…
contig_146	549	125	11	114	30.0255	gi|1967568509|gb|MW056181.1|	93.443	549	36	0	1	549	6241	6789	0	815	1543207	Rose leaf rosette-associated virus isolate VP Rose 126, partial genome	Martellivirales; Closteroviridae; Closterovirus	TGCAGGTTCACACCCGAGTGCTTACAGGCGGGTATAGTTTGGTTCCTGAAGATGGTTGACGGTCCCTTACATACTTTTTGCCGCAACTACTTCCTTATTGAATCGATGGTGATTAGGTGGGTGAGGAGCCATTTACCGGCGACGCTCAGAGCGACCTCCCGTCGCGTGAAAACTTACCCCGCTCTTGTTGTGAGCAACCCCAAGCGAAGAGATGGGGACCCAGATGGGGCAGGTGGGAGCTCGTCTGATTTCATTACGTCCGTTGAAAGGACGAAGGAGGCTCTTCTTTTTTCAGAGAGGCCTGTTAAACAAGCCCCAGTAGAACCTGACTCGGGGGAAGCTGAAGTACCACCAGAAGGAGTTGATAACACTGAGACGGAAAAATGCGATAGCGCGGTG…
contig_169	1890	273	41	232	19.8429	gi|1967568509|gb|MW056181.1|	98.413	882	14	0	1	882	15647	16528	0	1552	1543207	Rose leaf rosette-associated virus isolate VP Rose 126, partial genome	Martellivirales; Closteroviridae; Closterovirus	TGTGTACACATCGAGAGCGGTTTTGAGTTATCTGCTGTGCAGGTCAGTTCTTTCAGTGTTTTCTTCACTTATTGAGCTAATCTACGACTACGCACTCAATGGATGTGAACTATGCGGAAGGAGAAGCTGAGTCAGCTTATTTCTCCGCTTACGTTGTGAAACAAGCGAATGTGTATTACGTACACGTTCGATTGAATGATCCCTCACCACTCGTTGATTGGAGTAATACTGCCATAATTAGTGGTCGGCGAATGTTATTAAACGACGGTAGCTCCTTCGTGACTCTGGATCAAGCAGATTGTGAAGATGCTGTTCACGATGTGCTTCGTATCGCAGGGGACGCAGTTGGGGTGTGTCTGTTGGATATTCATAGTATCGCAAGGTCGCAAGTTACTACTC…
contig_176	1442	150	22	128	14.8121	gi|1967568509|gb|MW056181.1|	95.423	1442	65	1	1	1442	9463	10903	0	2296	1543207	Rose leaf rosette-associated virus isolate VP Rose 126, partial genome	Martellivirales; Closteroviridae; Closterovirus	CCCCTATAAACTGCTTGTGAAGTTGGGAGCTCCTTCTAAATATGTTACTGATGCGGGGCTTTTTGAGACGTTTGTGTCTTTTCGCGATTTAACTCGAGATTTGAACAATCAACTCGTTGTTGATCGCGTCGCTGCATTAGTTGAGGAGAAGTACAATTTCAAGTCTGGTTTCACCATCCCCGCTATTTGCGCCTTACACTGTTTGCGATCTAACTTTCTTTCCTACAGTAAGCTGTACCCTGTGCAGCGGGGTTTTTACAATTCAACGCTTAGTGAAATTCGCTCTCTACGCCGTCTTGTGCCCGGGCTCATAACTACTGTCTACAGGTGTGCGGGTGAAAAGCGGTATTTTAGTTACCTTAAGAGTGCTATCGATGAGGACCCTGTGCCCTTTACTGC…
contig_182	1141	313	55	258	37.3295	gi|1967568509|gb|MW056181.1|	95.793	1141	47	1	1	1141	14019	15158	0	1840	1543207	Rose leaf rosette-associated virus isolate VP Rose 126, partial genome	Martellivirales; Closteroviridae; Closterovirus	CTTGCGAAAGCCTTCTGAAAGTGACATGCGCCGTCGGTTTGGGGTTAAGGGTCGGCGGGAAAGGAGAGAGGTTAGAACACCCAACGTTTTGAAAACTGAGCAGCGTGCTCACTCTGTGACACGCGAAACAATATATAAAAGGTAGTGCCTAAACGCTAGTCAGTCGAAGCATGTCCACAGTTTTGGGAGACTCGAAGACTCTCATACCGTTTGTTGCTACACCGAGTGATGAGTTAGCTAAAACCCTCGCAGGTGCGTTTGACGTTCATAGTGTTGAAGAAACTCTCGATGAGAGGTACACCCAGGCTGAAGTGACTGAGGTGCTTCATCGACTGGAGACCTTCCTTGTCACGACGTACAAGATAGATGCTAAACATTTCGCTCATCACCTAGCCGCTA…
contig_197	706	48	12	36	9.48017	gi|1967568509|gb|MW056181.1|	95.164	703	34	0	1	703	3964	4666	0	1110	1543207	Rose leaf rosette-associated virus isolate VP Rose 126, partial genome	Martellivirales; Closteroviridae; Closterovirus	GTGGGGCATGTGCGAGAATTTTTTAATGCTACTGTATCTTACTTGCGCAGCCTCTACTCAAGCACCTCTAAGAGAGTGTTTAACATCATCAACAATCTGTTTGAATTTTGTCTTCAACCCTCTAATGGCGCCGTGGTATTTGAGGGTGTGGTGTCTTTGGCTTTAGCCCTTCTTAATCACTTGCCCGACTTGCTAATGGGTACTTTGTCCCTTAACTTCTTTTTGCTCAAATTAGTTGGGCAGATTGTGTTGGAATATAATGTTCTGAGTTATACTCATGATCATGCGGGCCCCGTCGAGACCAACAAGTCGGAGTTTTTCCGCAGATGTTGTGCTGCATTAGCAGCTGCTGTATCAACTAGGGGCGTGAAATTTGACTGCGTTGGCCTAGTACAATTG…
contig_206	1258	148	32	116	16.7965	gi|1967568509|gb|MW056181.1|	95.946	1258	51	0	1	1258	12832	14089	0	2041	1543207	Rose leaf rosette-associated virus isolate VP Rose 126, partial genome	Martellivirales; Closteroviridae; Closterovirus	GGTATTCCGAAGAGTATGTTTTTACAGGGGAGTGAGGAGGTTAGATCAGATGTGACACTGTACATGGATGTCGATCCGACTAAGGTTGGATGTAAATTTCCGATGGGCGCTGTGGAGGCCTATATAACCGAAACGTGTGACCGTGGGGAGGTTACTAAAGTACGTGTGGAGCATTCTTGGGCTTTATCGAATGCGTGCGGTAAATTAGTTGATGCTGATAACTTACACGAATACAAGATGATGGTGTTCGGTGAGAAATTAAAAGATGCCGTGATCGATGCAGTTGATAGCTCCTTTGGTGATTACTTAAGTCATTGCTTAGGTTTGTATAAAAAGTGTACTGTGGCTACAGATAGTGAGATGCGTGTGAGAGCTGAGTTTTTTAAATACTTAGCCGAA…
contig_235	688	65	9	56	12.6105	gi|1967568509|gb|MW056181.1|	95.203	688	33	0	1	688	1400	2087	0	1088	1543207	Rose leaf rosette-associated virus isolate VP Rose 126, partial genome	Martellivirales; Closteroviridae; Closterovirus	TTCACCGCATAAAGTGCGACACGGATTATCCCTCAGATTGTCCCCCCACGTGGGAGACTTTCTTTTTCAAAGGTAGAGGGGTGGGCCGGGTAGTGGACTGCGTCAATAGGTACATAGACTCCTATCAGTTTCCACATTGTAGGCTGTACTCCTACTTCACTAATGGGAGGGGTGACAGCGAAGGTATTCTGGTACCAATGAGCGAGGACTGGATAAAAGTGTATGTTAGGACCCACTTGGGTTGGGGCGTGTACTTTCGAAAGTCTTACGCTTTGAGTCGCGTGCTCTCTTGGTACGCTCTTGGAGAGTCGGTTAGTTCTTTCATTGATGAGGGTTTTTCAGAGGGCACGTGCTATCTCTCTCACCTCAATCGCGTATCCTTGGAGACCGGTGTACCTT…
contig_243	844	118	16	102	19.2512	gi|1967568509|gb|MW056181.1|	94.238	833	48	0	12	844	5441	6273	0	1273	1543207	Rose leaf rosette-associated virus isolate VP Rose 126, partial genome	Martellivirales; Closteroviridae; Closterovirus	GCGGAAGAAAATTTTGTCCTTCCTCTTTAAAGGTATGAGTTGCGTAGCATTATGTGCGCGCACCCTATTTGTGACGGGAGTGGTGACCAATGCGTGCTTTTCCCCTGGTGCTGTGAGTGCTATCGTGTATGGGATTTTCGGACCTGTTGTGGGGGGTTTAGTTCTTGGGAGCCTTTATGACCTCAGTCGTTTGTCCCCTCACACATTGGTTTCTTTAACCTTCACGTCGGTGTACTGTAACATTTTTGAAAGTGTATTCTTTTATCCGAGAGTGGTGTTAAATAAGATTAAAACACTCTGCGGTTTGCGGCCCGAACCTTTGTATGAAGATGGAGTGGTGGCTGTCCTGTTATTGAACAAATTTCACCAACTGTCTATCGAGCGGGATGGGGTGAACAC…
contig_250	590	161	25	136	35.1339	gi|1967568509|gb|MW056181.1|	96.271	590	22	0	1	590	12389	12978	0	968	1543207	Rose leaf rosette-associated virus isolate VP Rose 126, partial genome	Martellivirales; Closteroviridae; Closterovirus	TCCTCAGCGTAACGTTGTGAAGCTTAACGCTAGATTGAAGAAAGAGACTCGTCTACTACTAGCGGCTACGATCAACGGAGTGTGCCGTCAGACGTATCCGCTTTTTAAAGTGCAACTGGAAGAAGTGTTAAAGTCGGAGGTGGTGGATAACGACACTACTCTTCTACACGTCGTGCCATACATCACTTCCGAATACTTAAATGTTGCCGACTCACGAATGGGGGAGCTTGTTTCGGGGCGTCTACGGGGAACCGATGTGGAATCAATTCCTTTCTGACGCCGTGAAGACTTATAATAGTAATGATTTTCAAGAGGATCACACCATGAAAAATCATACGAAGATATCGGCGAAAACTCTGCGTAGTGCCCCAATGGGTTCTCGGGATCACGAGTTAGCAT…
contig_256	741	120	18	102	21.7976	gi|1967568509|gb|MW056181.1|	97.571	741	18	0	1	741	8280	9020	0	1269	1543207	Rose leaf rosette-associated virus isolate VP Rose 126, partial genome	Martellivirales; Closteroviridae; Closterovirus	ATCTCTTTTTCTTAATGATGTTATACCTGGTTCAGCCACAGTGGATTTGGGCGACCTGTCTGATGAGCTTTCTAGTACCCCTTTTGAAAGTGGGTGTGATGATGTGGTCATCAAAGCTTCTTCTGCTGATGTGCGCGGGACTTCCGCGCAGGCTCCGCATCGCGTTCGGCTTTGTGAAGAGTCAAGCGATTCCAAAGAGACTACCATCACTTCAGGAAAATCTGCTGTCGTATGAAAGTAGAAATTACAATTTCCTCAAGAGTGACAGACTTTGCGATCCCAAGGTTTTTGGTGAGGCCATGGCGATGGCGGTGTTGAAAAAGTGCTTCAACCTTGAAAAGTTTTCCACCCTTCGGGATGAAGTGATTGGGGTGTCGGAGTTAGCCACAGCCCAGTGGG…
contig_261	821	69	7	62	11.5981	gi|683418223|gb|KJ748003.1|	94.017	819	48	1	3	820	16485	17303	0	1240	1543207	Rose leaf rosette-associated virus isolate RLRaV-CWR.1, complete genome	Martellivirales; Closteroviridae; Closterovirus	CCGATCCAGAGGAAGAGGAGGTTAAATTGGTCGTGGATTCGACCACCGAAACCTACACTGCGAAGTTGCCTCTTCTCCCGAATTCTTCGATTTGCTTTAACTGTGAGATACCTGCTTTCATCGCGGACTAAGCTCAGCCTTACCGCTAACCATTTATGTCTATGTGTTAGTTTGCATCAAACTTTGATTCAAGGTTGATGCAATAGCGTGATCACTGGATTTGAGATCCATCGAAACTGTGGTGAAATCAGTGCAACATGAGGTCGTACTATTCTCTGGATAATTTCCGGGCTTTTAGCACTCTTATGACAGTGCTGCTCAAGGTGGTAGGTGACGACCACTTTGATCTGACTCTTTTCGGACACTACTGCAAGGTGCTTTCTGAGCGCCTGGCCGTTG…
contig_265	674	86	28	58	15.868	gi|1967568509|gb|MW056181.1|	94.76	668	35	0	7	674	506	1173	0	1040	1543207	Rose leaf rosette-associated virus isolate VP Rose 126, partial genome	Martellivirales; Closteroviridae; Closterovirus	CCGGCAATTCCGTTAAGGATGCCAACCCTCTGATGGGTGAAAGGAAAAGAAAGTCCCCAAAACAAATCAAAGCTATGGGACCTAGCGCAGCCGAATTTTTCTTTGGCTCGCCTGTCCTTGGCAGAGGTGTCTGCACTAGATCTTCCCGGCTAGTGCGGAGTGTTAAGGTGACTAAAGTCGGGAAGACTGCTGCTTGGCGCGATGCTGAGGAGTGTACTGAGCGCACCTCTTATAACCCCTTAGGGTCTGCTACTAAGGCCCCAGAGGTCGTGCACCACAAGCGCGAATTCGTTTACCCCGACATAACCTACATTTTTGGGGGTTACGATCGCCATGATGCCCGTACTACCTTTTTCTCGAAGGAGCGGTCGCTTGACCGGCTCGTGGCTTCGGCAGTTT…
contig_271	553	20	2	18	5.25497	gi|683418223|gb|KJ748003.1|	92.948	553	36	2	1	553	6501	7050	0	802	1543207	Rose leaf rosette-associated virus isolate RLRaV-CWR.1, complete genome	Martellivirales; Closteroviridae; Closterovirus	AGAAGCTTTACTTTTTAATGAGAGGCCGGTCAAAGTGGCACCCCCTTTAGCGAGTGTGCCAACCGTTCACCCTGTGCAGGGTGCGCCTAAAGAGGAGTCAGTACCCGACGAGGCTGAAGTTGGTAAGATTCCTTCCTCAAAAATAGACCTAATGCCTTTTGCTGAGGCAAAGAGGCAGGATGAGATGCAAAGTAAAAAGATGCAGTTGAAGGCGACCCAGAACCGCATACCTGAAAAACGCAAAACTTCTGGGTCCAAGCGGAAGGGCACTCAGGTATCAAAGTACCTTGAGAGACTTAACAACGAAGAGGGAGTTCCTACTTCCTATCAGGAAGCAGACCGGCGTTCTGAGTTTTACTCCATGACTAATTCCATAAGAGAGTTTTATTACTCCCACGA…
contig_275	545	22	6	16	5.30826	gi|683418223|gb|KJ748003.1|	95.037	544	27	0	1	544	8806	8263	0	856	1543207	Rose leaf rosette-associated virus isolate RLRaV-CWR.1, complete genome	Martellivirales; Closteroviridae; Closterovirus	GGCAGGCGCATGCTTGGTCAAGCACGAGTCATCAAGTTTCACTTTCGCGTCCCTTTTCACCATCAGAGAGAAATTCGAAACATCAGCCCCTATGTCCAAATGACGGCGCTCGAAATCTCTGAAAACATTACGAAGCTGATTTTCGTCTCTTTTCGCGGCCCATTGAGCAGTTGCTAACTCAGACACACCTATAACCTCATCTCGAAGGGTCGCGAACTTCTCAAGATTGAAGCACTTTTTCAGAACAGCCATTGCCATAGCTTCACCGAACACTTTGGGGTCACAGTGCCTCTCACTCTTCAAAAAATTATAATTCCTACTCTCATAAGACAGCAGGTTCTCTTGGAGCGATGGGAGCCTCTTCGGAATCGCTTGACTCTTCACAAAGCCGAACGCGAT…
contig_63	1308	853	117	736	90.6261	gi|683418223|gb|KJ748003.1|	77.542	659	137	9	488	1140	16734	17387	1.76e-102	387	1543207	Rose leaf rosette-associated virus isolate RLRaV-CWR.1, complete genome	Martellivirales; Closteroviridae; Closterovirus	ATCGTTAATAATGACAGTGGTGAAGTCAATCGGGTTTTCTATGGATGAAATCGAATCGATGGGGCGTTATGGAGTGCTTGTTTTCTTGACCTCAAAAAATAGTGTGTATTTTGTGATAAGGAAAACGGGAGGTAAAGTCTCCATTCGCGACATATCAGTAACAGAATCATCGGATGGGCTGGCATTGAGGGAGGGTGAAACAGTTTCGCTCAACGGTAATGATTTTGTATTATCTCTGTTGGTCGACCCCACTCGAGGATCCGTTAAGGTGACCGTTAATTCGATCACTGAAACTTACTCCGCGAAGTTACCTTTACTACCAGGTTGTGCGGTTCGATTCAACTGTGATATTCCGGATTACATTGTGGATTGAGCTCAGCTCAGCCACCAGGTATTTGT…
contig_190	921	73	13	60	11.1824	gi|683418223|gb|KJ748003.1|	83.913	920	148	0	1	920	8318	9237	0	880	1543207	Rose leaf rosette-associated virus isolate RLRaV-CWR.1, complete genome	Martellivirales; Closteroviridae; Closterovirus	TCTCGCATACACCTTTTGAGAGTGGGTGTGATGATGTGCTTACTAGGGAGTCTTCTGCAGACATGCGCGGAACATCCGCGCAGGCTCCGCATCGTGTTCGGCTTTGTGAGGAGTCAAGCGATCCCCAAGCGTCTCCCATCACTCCAAGAGAACCTGCTGTCGTATGAGAGTAGGAACTACAATTTTTTGAAGAGTGACAGACACTGCGACCCTAAGGTGTTTGGTGAGGCCATGGCGATGGCTGTTTTGAAGAAGTGTTTTAATCTTGATAAATTTGCGACCCTTCGGGATGAAGTTATTGGTGTGTCGGAATTGGCGACGGCTCAATGGGCCGCGAAGCGGGACGAAAACCAAATTCGCAATGTTTTTAAAGACTTTGAACGTCGCCACTTGGATATA…
contig_66	5727	1912	316	1596	46.3316	gi|683418223|gb|KJ748003.1|	85.498	5737	814	16	1	5727	11894	17622	0	5969	1543207	Rose leaf rosette-associated virus isolate RLRaV-CWR.1, complete genome	Martellivirales; Closteroviridae; Closterovirus	CAGGGCCGCGGTTGCTTGTGGGTGCGCTCTATATGCGCGCGGAATATCAACCGACAGTTCCATTTTGATGGTGGACTGCGCCACAAGTAACATATCAATTTCGAGTTACCGTGGTGATTCCATTGTGGTTATCCCAGCTGGGTCACCAATTCCGTTCGATGGTGAAAGGGATATTGAGATGCTTAATGCTACGGCCACTTCCACGTATAACGCTCGGTTGTTTGAGGGTAACTTCATGAAATGCGCTTATAATGAGTTGATATACTCAAAGACGATCGAACTTCGCTCGTTGGGGGTAGTCGCTCAGCAACCCACCTCTGCTAAATTGAAATTGCTGACCAAGATAGATTCCGTGGGGAAGATCTCGTTTAGTATTGTTGGTCCTTCGGGAGTACCTTA…
contig_141	1649	208	30	178	17.8241	gi|683418223|gb|KJ748003.1|	85.939	1650	230	2	1	1649	9869	11517	0	1760	1543207	Rose leaf rosette-associated virus isolate RLRaV-CWR.1, complete genome	Martellivirales; Closteroviridae; Closterovirus	CGCTGAGAACGTTTGTTTCATTTGATTGATGGCCCCGAGCGCTATTTCTCGTATTTGTGATGTCTCGACTATCGCCGATTCTGCAGTTGTCTCCTCGGGTGAGCTCGTGTTTGAATTGAGCGCGTCGGATCGATGTTTACCAGGGGAAGTCTTCTTCTTCCGCTTTGAGCAGCTGGGTGGTAATGCGGCCATTCTTCTTTTTTCTTTGAGTTCTGACGGTAAGGTGATAGTTGAGGAAAGGTATCAGAGCCTACAAGATAGCTGCGTGAAGATAGGGCGTAGAGTAAAATTTCCAGGTAGAAATGCTGTGGTTAACTTGTGCGTGGCTAATGAGTGTGCTCAAGTTAGTGTGAGTGATAACACCGCAAAGGAGTTCTTTACTTTTCGGTTACCAACATC…
contig_188	874	270	18	252	42.9908	gi|157849947|gb|EU024678.1|	89.588	874	87	4	3	874	13	884	0	1107	474454	Rose spring dwarf-associated virus, complete genome	Tolivirales; Tombusviridae; Luteovirus	CTCACCCTTACAAAAGTATTCCTTTTCTTTTGACTGCAGAGTGATTTTCCTCCTTTCTTAAGAAACTGAATCTCTGGCCGGCTGTTTTGTGATCAGTTCCCAGACTCATAACAACTGTCAAACATCGACATCTTCCACCTTTCACTCCACCCTTCTGTAATATCTTGACCAACAGGATGTTGCTTTTCGAAGGTTTGTTAACCGCCTCCGCCCGTGTAGTTAAAGATTTTATTTCATACATCTACAGCCGTCTCAAATCTGTCTATTATTCATTGAAGAGATGGTTGTGGACGTTGCAGGGGAAATTTCAGCCCCATGATGCATTTGTCGCCATGGTCTACGGATACATGGACGACGTGGAAGACTTCGAGGTGCCCCTTGCCCTCGAGTACGAAGTCA…
contig_60	4873	2213	283	1930	62.7457	gi|157849947|gb|EU024678.1|	95.529	4876	208	6	1	4873	923	5791	0	7788	474454	Rose spring dwarf-associated virus, complete genome	Tolivirales; Tombusviridae; Luteovirus	TCGAAGAGGTAGAGACGGGTGAATTCCACCCTGTCAAGCAGGATGCCGATGGTGAGGACTTACCTAGGCTGCCCAAGATTGAAGTCGTCCGCAGAATCAAGGATGACTGCCACAGATCTGCTGCTACCTGGATCAGAGAGTATGTGCGGTGCAAAAATTCACAACTTTCTGCAGATGAAGTCTCCCATGCAACAATTACAAGGTATGTGGAGCAATTCTGTGAAAAGAACAAGATGGACATGGATTCCCGTGTCTTCTTGATGCAAAGAGCACTACTAATGGTCCCCATCCCTAAGCCCATTGATATTGACATTGCAATGACTGTCCACTCACCCGCAGCAAGAGAGCTACGGTCTATTGTGGACACAGCCGCTTCGTCGGTTTTTTAAATGGGCTCTG…
contig_289	572	20	10	10	4.82692	gi|1785471271|gb|MN532620.1|	83.826	575	87	4	1	572	1638	2209	1.49e-149	542	2686502	Plasmopara viticola lesion associated ourmia-like virus 33 isolate DMG-A_37357 RNA dependent RNA polymerase gene, complete cds		CAATTTTCTAAAGAAATAAAAAATAAAGTATTAGTCGAAACTCTGCGCACCTGCAGTAAGTGGGTCAATCTCTCGCAGCGTTCTCTTCAACGTGGTCTTCAGTGTCGCGTGTCACCGGGAGTAATCCGTGGTGCCGGCCTGTTGAAACGTGAAGTGTTTTATAACGCATTAGACGAAGAGCCCTTGTGCCCGCCACCTTTCAAACGATGGCAGCACTGGGGTTTACCCACTGGCTGGCAGAGTGTAGTGAAGACGGATGGGTCCGGAGACGACGTTGGGGCTATGCATGCTCTAGTATCATCTACCTGGGGTGGTTACATAACCCATAAGGAGATTGACTTCGATGCATATCTCAATGCCGTTCGAGATCGCACGTTCAGATACGTCCCTCTGAATCGT…
